# Supplementary material for: Glycolipid-peptide conjugate vaccines enhance CD8+ T cell responses against human viral proteins
Source: PubMed Central journal article supplement (PMC5660197; doi:10.1038/s41598-017-14690-5), 2017-10-27
Supplement: 41598_2017_14690_MOESM1_ESM.pdf [file 41598_2017_14690_MOESM1_ESM.pdf]

**Supplementary Data; Supplementary Methods**

**Glycolipid-peptide conjugate vaccines enhance CD8<sup>+</sup> T cell responses against human viral proteins**

Speir M, Authier-Hall A, Brooks CR, Farrand KJ, Compton BJ, Anderson, RJ, Heiser A, Osmond TL,

Tang CW, Berzofsky JA, Terabe M, Painter GF, Hermans IF, Weinkove R

**Supplementary Figure S1:** C57BL/6 mice (n = 5 per group) were vaccinated intravenously with  $\alpha$ -GalCer + E7<sub>49-57</sub> peptide admix,  $\alpha$ -GalCer-E7<sub>49-57</sub> or PBS as a naïve control. Splenocytes from vaccinated mice were re-stimulated ex vivo with E7<sub>49-57</sub> peptide and production of IFN- $\gamma$  was assessed by ELISpot; \*\*\* p<0.001, \* p<0.05; SFU, spot-forming units.

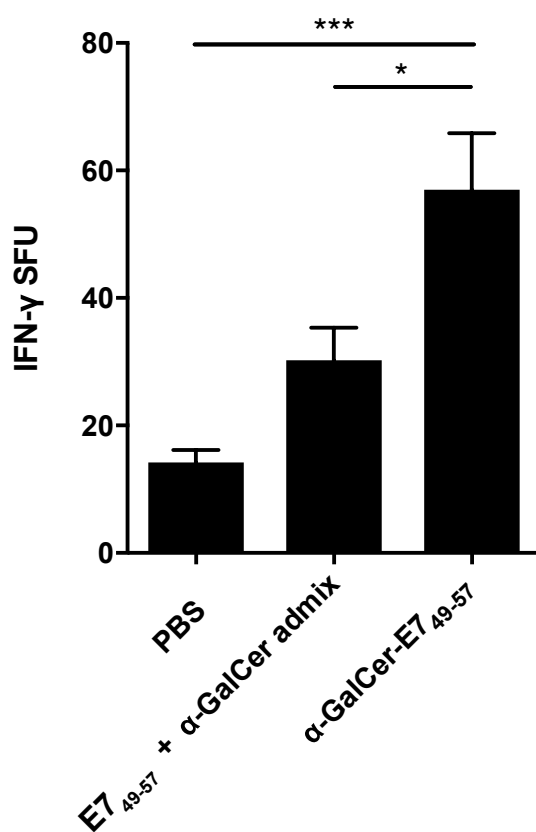

**Supplementary table S1:** Expression of the 30 immune-related genes most upregulated upon culture of human PBMCs with  $\alpha$ -GalCer-pp65<sub>495-503</sub>, compared to pp65<sub>495-503</sub> peptide alone. Mean of four human donors.

| <b>Gene</b>     | <b>Mean expression<br/>(relative to peptide alone)</b> |
|-----------------|--------------------------------------------------------|
| <i>CXCL10</i>   | 16.88                                                  |
| <i>CCL13</i>    | 5.86                                                   |
| <i>SPINK5</i>   | 5.44                                                   |
| <i>CXCL11</i>   | 5.04                                                   |
| <i>C8B</i>      | 4.66                                                   |
| <i>CCL1</i>     | 3.31                                                   |
| <i>CXCL9</i>    | 3.20                                                   |
| <i>CCL8</i>     | 2.96                                                   |
| <i>TNFRSF8</i>  | 2.85                                                   |
| <i>IFNG</i>     | 2.71                                                   |
| <i>COLEC12</i>  | 2.66                                                   |
| <i>TFEB</i>     | 2.49                                                   |
| <i>IDO1</i>     | 2.29                                                   |
| <i>IL3RA</i>    | 2.24                                                   |
| <i>IFIT2</i>    | 2.24                                                   |
| <i>TREM1</i>    | 2.21                                                   |
| <i>DUSP4</i>    | 2.18                                                   |
| <i>C9</i>       | 2.14                                                   |
| <i>FEZ1</i>     | 2.09                                                   |
| <i>MRC1</i>     | 2.06                                                   |
| <i>IL2RA</i>    | 2.06                                                   |
| <i>CTLA4</i>    | 2.05                                                   |
| <i>LCN2</i>     | 1.96                                                   |
| <i>RORC</i>     | 1.95                                                   |
| <i>IL1R1</i>    | 1.93                                                   |
| <i>TNFRSF9</i>  | 1.90                                                   |
| <i>GZMB</i>     | 1.89                                                   |
| <i>CCL24</i>    | 1.82                                                   |
| <i>MEFV</i>     | 1.79                                                   |
| <i>SERPINB2</i> | 1.78                                                   |

## Supplementary Methods

### ***Ex vivo* peptide-specific IFN- $\gamma$ production**

Conjugate vaccines or admixed controls were diluted in sterile phosphate buffered saline (PBS) solution for injection. C57BL/6 mice were injected intravenously with either 8.5  $\mu\text{g}$  of  $\alpha$ -GalCer-E7<sub>49-57</sub> conjugate vaccine, admixed 2.3  $\mu\text{g}$   $\alpha$ -GalCer and 3  $\mu\text{g}$  HPV16 E7<sub>49-57</sub> peptide (each corresponding to 2.68 nmol), or PBS alone as a naïve control. After 11 days, spleens were harvested for quantitation of *ex vivo* IFN- $\gamma$  production using a mouse IFN- $\gamma$  ELISpot<sup>PLUS</sup> kit (Mabtech), according to manufacturer's instructions. Briefly, Millipore MultiScreen-HA 96-well filter plates (Millipore) were coated with 15  $\mu\text{g}/\text{mL}$  IFN- $\gamma$  mAb in PBS overnight at 4 °C. Splenocytes were seeded at  $4 \times 10^5$  cells/well and incubated overnight with 0.1  $\mu\text{M}$  E7<sub>49-57</sub> peptide at 37°C. Following washing, plates were incubated with 1  $\mu\text{g}/\text{ml}$  biotin-labeled anti-IFN- $\gamma$  for 2 h at room temperature. Plates were then washed and treated with 1:1000 dilution of streptavidin-alkaline phosphatase for 1 h at room temperature. Plates were developed with nitro-blue tetrazolium and 5-bromo-4-chloro-3-indolyl-phosphate substrate until all spots were clearly visible. Developed plates were dried and counted on an automated ELISpot reader (Autoimmun Diagnostika, Strassberg, Germany).
